# Supplementary material for: Melatonin Modulates Lipid Metabolism and Reduces Cardiovascular Risk in Apolipoprotein E-Deficient Mice Fed a Western Diet
Source: MDPI journal article supplement (doi:10.3390/nutraceuticals4020016), 2024-05-09
Supplement: s1 [file s1]

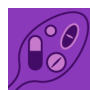

# Supplementary Materials: Melatonin Modulates Lipid Metabolism and Reduces Cardiovascular Risk in Apolipoprotein E-Deficient Mice Fed a Western Diet

Guillermo Santos-Sánchez, Ana Isabel Álvarez-López, Eduardo Ponce-España, Ana Isabel Álvarez-Ríos, Patricia Judith Lardone, Antonio Carrillo-Vico and Ivan Cruz-Chamorro

Table S1. Western diet composition.

| Ingredients                             | %     |
|-----------------------------------------|-------|
| <b>Fat (2.12 kcal/g)</b>                |       |
| Lard                                    | 20.68 |
| Soybean oil                             | 2.91  |
| <b>Carbohydrate (1.65 kcal/g)</b>       |       |
| Sucrose                                 | 20.09 |
| Maltodextrin                            | 11.65 |
| Dextrin                                 | 8.48  |
| Powdered cellulose                      | 5.82  |
| <b>Protein (0.83 kcal/g)</b>            |       |
| Casein - vitamin tested                 | 23.30 |
| <b>Vitamin Mix</b>                      | 1.16  |
| <b>Mineral Mix</b>                      | 1.16  |
| <b>Food additives</b>                   |       |
| Potassium citrate. Tribasic monohydrate | 1.92  |
| Calcium phosphate                       | 1.51  |
| Calcium carbonate                       | 0.64  |
| L-Cystine                               | 0.35  |
| Choline bitartrate                      | 0.23  |
| Food colouring (FD&C Red No.40)         | 0.05  |
| <b>Total energy (4.60 kcal/g)</b>       |       |

Ingredients percentage of the high-fat Western diet and energy provided from the different macromolecules.
